# Supplementary material
Source: publisher site journal article supplement (https://www.dovepress.com/article/420747)
Supplement: Supplementary file 1 [file get_supplementary_file.php]

**Supplementary materials**

**Supplemented Tables**

**Table S1** Clinical characteristics of patients

| Patients Number | Sex | Age | Diagnose | Risk stratification | Disease remission status before allo-HSCT | Donor | HLA match | Conditioning regimen | GVHD prophylaxis regimen | aGVHD onset day | aGVHD degree |
| --- | --- | --- | --- | --- | --- | --- | --- | --- | --- | --- | --- |
| No.1 | Female | 23 | ALL | High risk | NR | Younger sister | Identical | Myeloablative | CSA+MTX+MMF | +86 | II |
| No.2 | Male | 28 | MDS | High risk | NR | Younger brother | Identical | Myeloablative | CSA+MTX+MMF | +18 | I |
| No.3 | Male | 62 | MDS | Extremely  high risk | NR | Son | Haploidentical | Attenuated | CSA+MTX+MMF+ATG | +18 | II |
| No.4 | Female | 47 | PML transform to AML | Low risk | CR | Younger brother | Identical | Attenuated | CSA+MTX+MMF+Ruxolitinib |  | 0 |
| No.5 | Male | 56 | AML | High risk | CR2 | Younger sister | Identical | Attenuated | CSA+MTX+MMF+ATG | +34 | III |
| No.6 | Female | 53 | AML (MDS transformation) | High risk | Untreated | Daughter | Haploidentical | Myeloablative | CSA+MTX+MMF+ATG | +16 | II |
| No.7 | Male | 16 | ALL | High risk | CR | Elder sister | Identical | Myeloablative | CSA+MTX+MMF |  | 0 |
| No.8 | Male | 14 | AML (MDS transformation) | High risk | NR | Younger sister | Identical | Myeloablative | CSA+MTX+MMF |  | 0 |
| No.9 | Female | 61 | MDS | High risk | Untreated | Son | Haploidentical | Myeloablative | CSA+MTX+MMF+ATG |  | 0 |
| No.10 | Male | 30 | AML | Median risk | CR | Elder brother | Haploidentical | Myeloablative | CSA+MTX+MMF+ATG |  | 0 |
| No.11 | Female | 39 | ALL | High risk | CR | Elder sister | Haploidentical | Attenuated | CSA+PTCY+MMF+ATG | +50 | I |
| No.12 | Male | 40 | ALL | High risk | CR | Younger sister | Haploidentical | Myeloablative | CSA+MTX+MMF+ATG | +35 | I |
| No.13 | Female | 51 | AML | High risk | CR | Daughter | Haploidentical | Attenuated | CSA+PTCY+MMF+ATG |  | 0 |

ALL: acute lymphoblastic leukemia; MDS: myelodysplastic syndrome; PML: primary myelofibrosis; AML: acute myeloid leukemia; NR: non-remission; CR: complete remission; CSA: Cyclosporine A; MTX: methotrexate; MMF: mycophenolate mofetil; ATG: antithymocyte globulin; PTCY: post cyclophosphamide.

**Supplemented Figures**


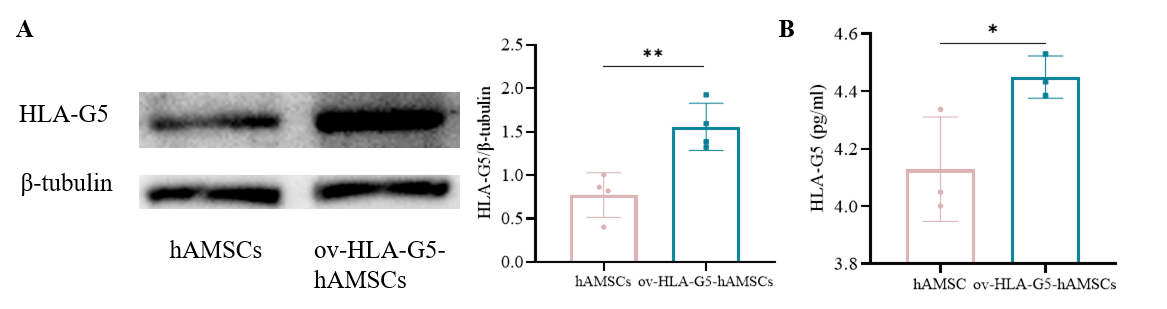


**Figure S1** The expression levels of HLA-G5 in hAMSCs and ov-HLA-G5-hAMSCs.

(A) HLA-G5 protein expression in different groups measured by Western blot analysis (n=4). (B) HLA-G5 levels in cell culture medium in different groups measured by the human HLA-G5 ELISA kit (n=3). * p <0.05, ** p <0.01, based on the student’s t-test.


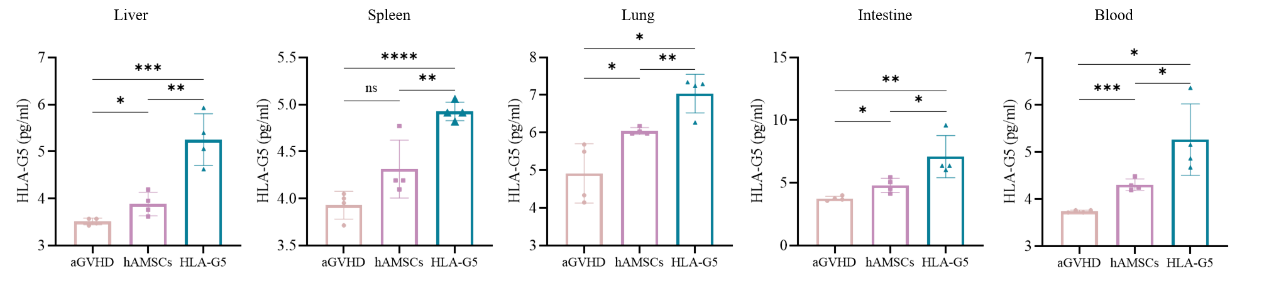


**Figure S2** HLA-G5 levels in target organs and peripheral blood in mice measured by the human HLA-G5 ELISA kit. ns, not significant, * p <0.05, ** p <0.01, *** p <0.001, **** p <0.0001, based on the One-way ANOVA and Tukey’s post hoc test. n=4 per group.


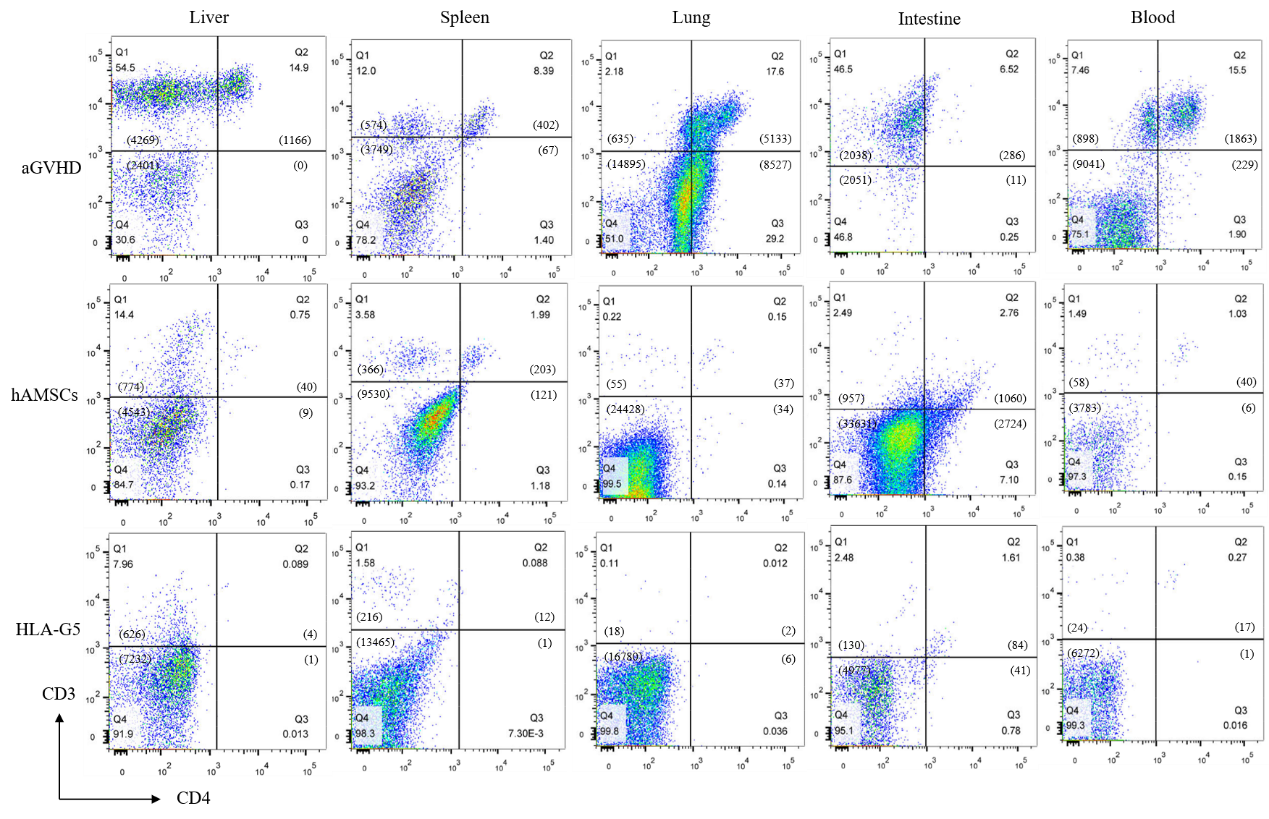


**Figure S3** The flow graphs of CD3+CD4+T cells in target organs and peripheral blood of aGVHD mice. The cell count was given in parentheses.


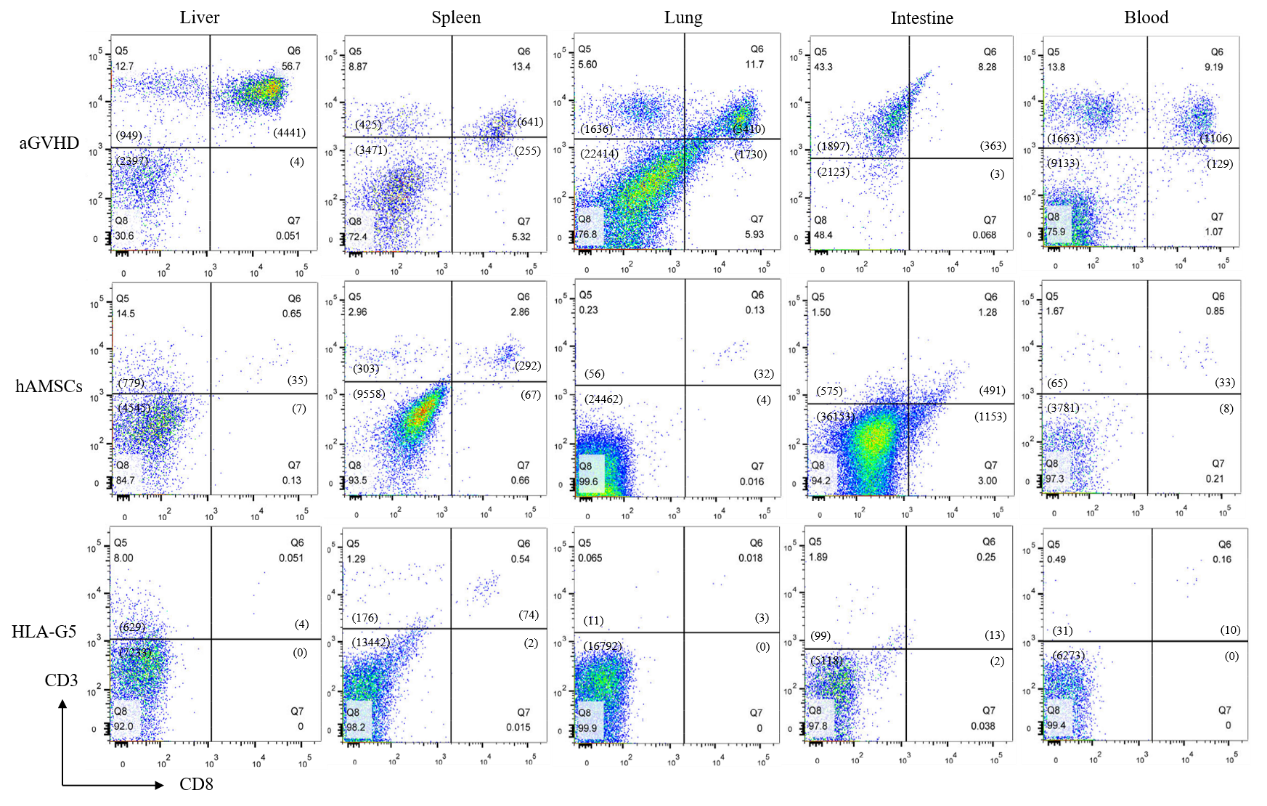
 **Figure S4** The flow graphs of CD3+CD8+T cells in target organs and peripheral blood of aGVHD mice. The cell count was given in parentheses.


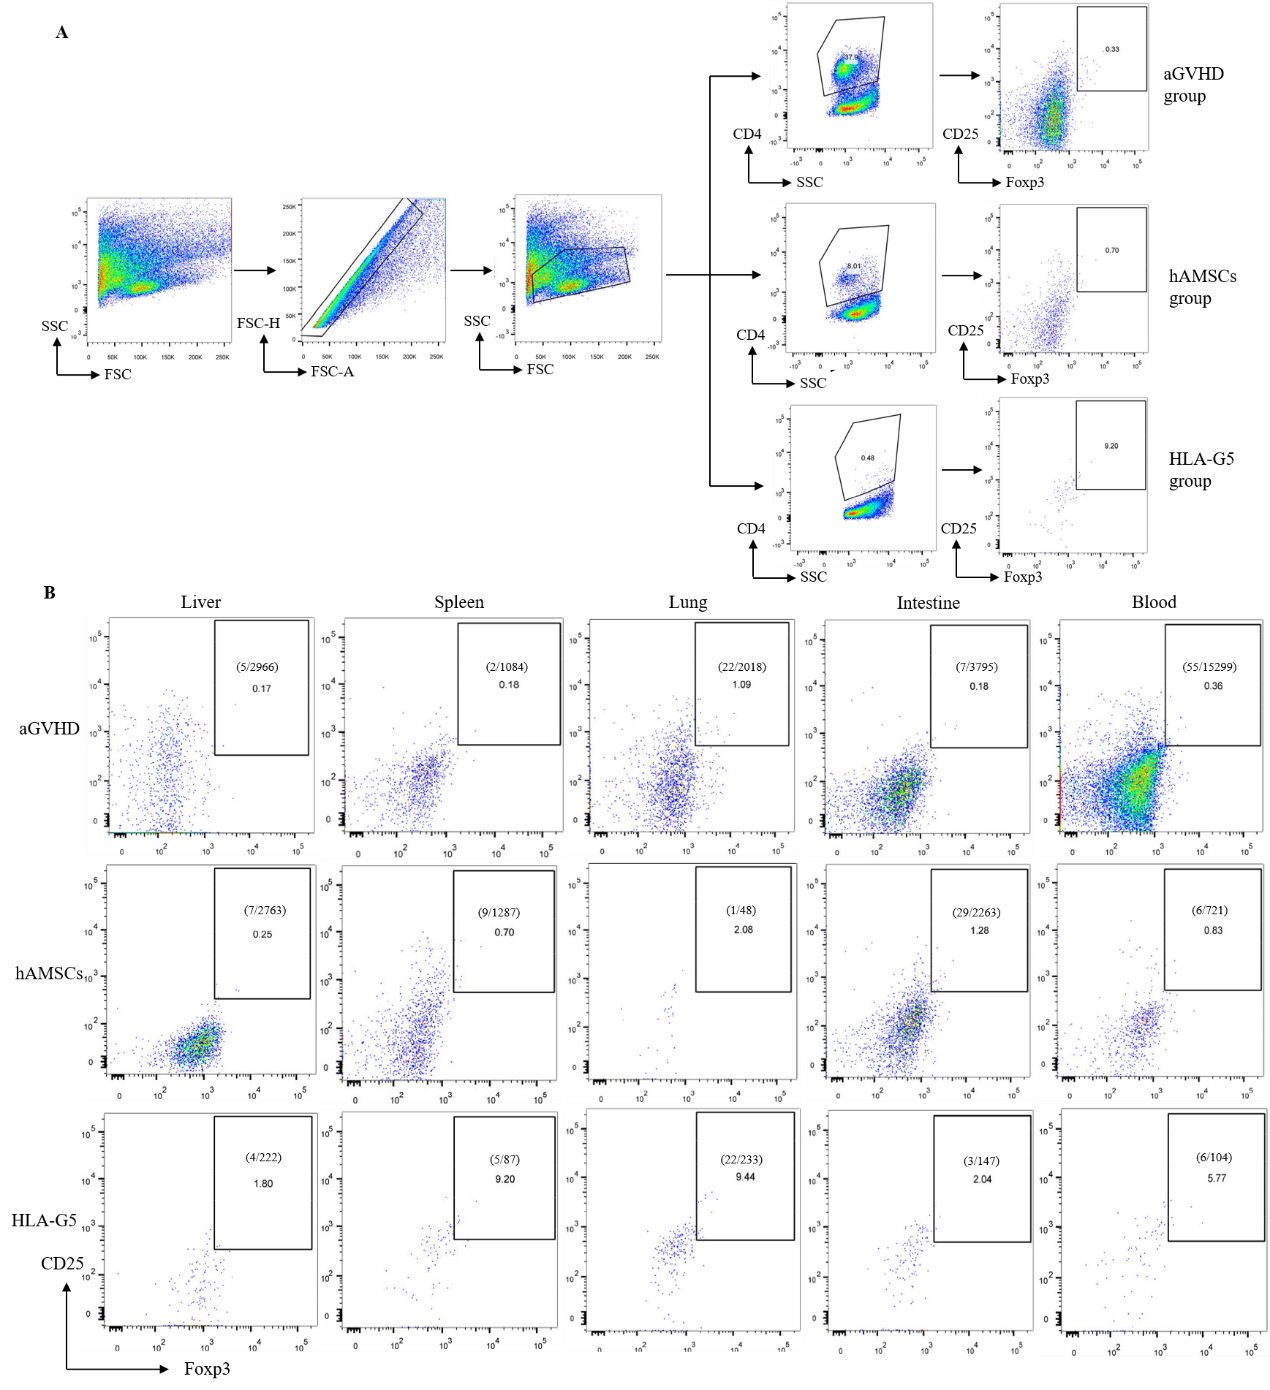


**Figure S5** The flow graphs of CD4+CD25+Foxp3+Tregs in target organs and peripheral blood of aGVHD mice.

(A) Representation of flow graph of showing proportion of CD4+T cell populations and Tregs percentage in each group. (B) The flow graph of Tregs among groups. The cell count was given in parentheses.
